# Supplementary material for: Normative Data for Macular Thickness and Volume for Optical Coherence Tomography in a Diabetic Population without Maculopathies
Source: MDPI journal article supplement (doi:10.3390/jcm12165232), 2023-08-11
Supplement: s1 [file s1]

**Supplementary Table 1. Normative Data for ETDRS Macular Thickness (in  $\mu\text{m}$ ) and volume (in  $\text{mm}^3$ ) measured by Spectral-Domain Optical Coherence Tomography (Topcon 3SD OCT Master), by age.**

|                                                                      | $\leq 60$ years<br>(N=1333) | $>60$ years<br>(N=2077)   | Absolute<br>standardized<br>difference | p-value          |
|----------------------------------------------------------------------|-----------------------------|---------------------------|----------------------------------------|------------------|
| <b>ETDRS macular thickness<br/>and volume,<br/>mean (SD); 95% CI</b> |                             |                           |                                        |                  |
| CST                                                                  | 237.9 (22.7); 236.7-239.1   | 238.4 (24.4); 237.3-239.4 | 0.02                                   | 0.59             |
| Center                                                               | 203.1 (29.0); 201.6-204.7   | 206.8 (33.1); 205.4-208.2 | 0.12                                   | <b>&lt;0.001</b> |
| Inner temporal                                                       | 288.0 (16.6); 287.2-288.9   | 283.2 (16.7); 282.5-283.9 | 0.29                                   | <b>&lt;0.001</b> |
| Inner superior                                                       | 301.2 (17.8); 300.2-302.1   | 293.6 (18.5); 292.8-294.4 | <b>0.42</b>                            | <b>&lt;0.001</b> |
| Inner nasal                                                          | 302.9 (16.7); 302.0-303.8   | 296.5 (17.4); 295.7-297.2 | 0.38                                   | <b>&lt;0.001</b> |
| Inner inferior                                                       | 296.7 (17.5); 295.7-297.6   | 290.5 (18.0); 289.7-291.2 | 0.35                                   | <b>&lt;0.001</b> |
| Outer temporal                                                       | 248.0 (15.7); 247.1-248.8   | 241.4 (18.0); 240.6-242.2 | 0.39                                   | <b>&lt;0.001</b> |
| Outer superior                                                       | 260.0 (15.4); 259.2-260.8   | 251.7 (16.0); 251.0-252.4 | <b>0.53</b>                            | <b>&lt;0.001</b> |
| Outer nasal                                                          | 277.2 (15.5); 276.4-278.0   | 268.6 (16.7); 267.9-269.4 | <b>0.53</b>                            | <b>&lt;0.001</b> |
| Outer inferior                                                       | 256.9 (15.0); 256.1-257.7   | 250.9 (16.5); 250.1-251.6 | 0.38                                   | <b>&lt;0.001</b> |
| Average thickness                                                    | 268.1 (13.5); 267.3-268.8   | 261.2 (14.2); 260.6-261.8 | <b>0.50</b>                            | <b>&lt;0.001</b> |
| Total volume                                                         | 7.57 (0.38); 7.55-7.59      | 7.38 (0.40); 7.36-7.40    | <b>0.50</b>                            | <b>&lt;0.001</b> |

ETDRS: Early Treatment Diabetic Retinopathy Study; SD: standard deviation; CST: central subfield thickness; CI: confidence interval.

**Supplementary Table 2. Normative Data for Macular Thickness (in  $\mu\text{m}$ ) and volume (in  $\text{mm}^3$ ) measured by Spectral-Domain Optical Coherence Tomography (Topcon 3SD OCT Master), by gender.**

|                                                                      | <b>Male</b><br>( <i>N</i> =1967) | <b>Female</b><br>( <i>N</i> =1443) | <b>Absolute<br/>standardized<br/>difference</b> | <b>p-value</b>   |
|----------------------------------------------------------------------|----------------------------------|------------------------------------|-------------------------------------------------|------------------|
| <b>ETDRS macular thickness<br/>and volume,<br/>mean (SD); 95% CI</b> |                                  |                                    |                                                 |                  |
| CST                                                                  | 243.3 (22.3); 242.3 - 244.3      | 231.2 (23.8); 230.0 - 232.4        | <b>0.52</b>                                     | <b>&lt;0.001</b> |
| Center                                                               | 209.5 (31.4); 208.1 - 210.9      | 199.7 (30.9); 198.1 - 201.3        | 0.31                                            | <b>&lt;0.001</b> |
| Inner temporal                                                       | 288.6 (16.1); 287.9 - 289.3      | 280.3 (16.5); 279.5 - 281.2        | <b>0.51</b>                                     | <b>&lt;0.001</b> |
| Inner superior                                                       | 299.2 (18.3); 298.4 - 300.0      | 293.0 (18.0); 292.1 - 293.9        | 0.34                                            | <b>&lt;0.001</b> |
| Inner nasal                                                          | 302.5 (17.1); 301.7 - 303.2      | 294.3 (16.7); 293.4 - 295.2        | <b>0.48</b>                                     | <b>&lt;0.001</b> |
| Inner inferior                                                       | 296.5 (17.5); 295.7 - 297.3      | 288.0 (17.7); 287.0 - 288.9        | <b>0.41</b>                                     | <b>&lt;0.001</b> |
| Outer temporal                                                       | 247.0 (16.0); 246.3 - 247.7      | 239.9 (18.7); 238.9 - 240.9        | 0.16                                            | <b>&lt;0.001</b> |
| Outer superior                                                       | 256.1 (16.5); 255.4 - 256.8      | 253.4 (15.8); 252.6 - 254.3        | 0.23                                            | <b>&lt;0.001</b> |
| Outer nasal                                                          | 273.6 (16.5); 272.9 - 274.3      | 269.8 (16.9); 268.9 - 270.6        | 0.20                                            | <b>&lt;0.001</b> |
| Outer inferior                                                       | 254.9 (19.6); 253.9 - 255.3      | 251.3 (16.7); 250.5 - 252.2        | 0.20                                            | <b>&lt;0.001</b> |
| Average thickness                                                    | 266.1 (14.3); 265.5 - 266.7      | 260.9 (14.1); 260.1 - 261.6        | 0.31                                            | <b>&lt;0.001</b> |
| Total volume                                                         | 7.5 (0.40); 7.50 - 7.54          | 7.37(0.39); 7.35 - 7.39            | 0.37                                            | <b>&lt;0.001</b> |

ETDRS: Early Treatment Diabetic Retinopathy Study; SD: standard deviation; CST: central subfield thickness; CI: confidence interval.

**Supplementary Table 3. Normative Data for Macular Thickness (in  $\mu\text{m}$ ) and volume (in  $\text{mm}^3$ ) measured by Spectral-Domain Optical Coherence Tomography (Topcon 3SD OCT Master), by DR existence.**

|                                                                     | <b>No DR</b><br>(N=2849)  | <b>DR</b><br>(N=561)      | <b>Absolute<br/>standardized<br/>difference</b> | <b>p-value</b>   |
|---------------------------------------------------------------------|---------------------------|---------------------------|-------------------------------------------------|------------------|
| <b>ETDRS macular thickness and<br/>volume,</b><br>mean (SD); 95% CI |                           |                           |                                                 |                  |
| CST                                                                 | 238.0 (23.4); 237.6-239.9 | 239.0 (25.4); 236.9-241.2 | 0.04                                            | 0.34             |
| Center                                                              | 205.1 (31.2); 204.0-206.3 | 206.6 (33.2); 203.8-209.3 | 0.04                                            | 0.32             |
| Inner temporal                                                      | 284.9 (16.6); 284.3-285.5 | 286.0 (17.7); 284.5-287.5 | 0.06                                            | 0.17             |
| Inner superior                                                      | 296.5 (18.2); 296.9-297.2 | 296.8 (19.5); 295.1-298.4 | 0.01                                            | 0.77             |
| Inner nasal                                                         | 299.0 (17.2); 298.4-299.7 | 298.8 (18.3); 297.2-300.3 | 0.02                                            | 0.72             |
| Inner inferior                                                      | 292.8 (17.8); 291.1-293.4 | 293.5 (19.5); 291.9-295.1 | 0.04                                            | 0.4              |
| Outer temporal                                                      | 243.6 (17.2); 242.9-244.2 | 246.1 (18.5); 244.6-247.6 | 0.14                                            | <b>0.001</b>     |
| Outer superior                                                      | 254.5 (16.0); 253.9-255.1 | 257.2 (17.4); 255.7-258.6 | 0.16                                            | <b>&lt;0.001</b> |
| Outer nasal                                                         | 271.8 (16.5); 271.1-272.4 | 273.1 (18.1); 271.6-274.6 | 0.08                                            | 0.07             |
| Outer inferior                                                      | 252.9 (16.0); 252.3-253.5 | 254.6 (17.2); 253.2-256.0 | 0.10                                            | <b>0.02</b>      |
| Average thickness                                                   | 263.6 (14.1); 263.1-264.1 | 265.3 (15.2); 264.0-266.5 | 0.11                                            | <b>0.01</b>      |
| Total volume                                                        | 7.45 (0.40); 7.43-7.56    | 7.50 (0.42); 7.46-7.53    | 0.11                                            | <b>0.01</b>      |

ETDRS: Early Treatment Diabetic Retinopathy Study; SD: standard deviation; CST: central subfield thickness; CI: confidence interval; DR: diabetic retinopathy.

**Supplementary Table 4. Normative Data for Macular Thickness (in  $\mu\text{m}$ ) and volume (in  $\text{mm}^3$ ) measured by Spectral-Domain Optical Coherence Tomography (Topcon 3SD OCT Master), by type of DM.**

|                                                                      | Type 1 DM<br>(N=275)      | Type 2 DM<br>(N=3135)     | Absolute<br>standardized<br>difference | p-value          |
|----------------------------------------------------------------------|---------------------------|---------------------------|----------------------------------------|------------------|
| <b>ETDRS macular thickness<br/>and volume,<br/>mean (SD); 95% CI</b> |                           |                           |                                        |                  |
| CST                                                                  | 237.0 (22.9); 242.3-239.7 | 238.3 (23.8); 237.5-239.1 | 0.05                                   | 0.40             |
| Center                                                               | 199.3 (27.0); 196.1-202.5 | 205.9 (30.9); 204.8-207.0 | 0.22                                   | <b>&lt;0.001</b> |
| Inner temporal                                                       | 289.5 (16.1); 287.6-291.5 | 284.7 (16.8); 284.1-285.3 | 0.29                                   | <b>&lt;0.001</b> |
| Inner superior                                                       | 303.7 (16.9); 301.7-305.7 | 295.9 (18.4); 295.3-296.6 | <b>0.44</b>                            | <b>&lt;0.001</b> |
| Inner nasal                                                          | 305.0 (17.4); 303.0-307.1 | 298.5 (17.3); 297.9-299.1 | 0.38                                   | <b>&lt;0.001</b> |
| Inner inferior                                                       | 299.5 (17.9); 297.4-301.7 | 292.3 (18.0); 291.7-293.5 | <b>0.40</b>                            | <b>&lt;0.001</b> |
| Outer temporal                                                       | 294.7 (16.7); 247.7-251.7 | 243.5 (17.5); 242.9-244.1 | 0.36                                   | <b>&lt;0.001</b> |
| Outer superior                                                       | 263.7 (14.6); 261.9-265.4 | 254.2 (16.2); 253.6-254.8 | <b>0.61</b>                            | <b>&lt;0.001</b> |
| Outer nasal                                                          | 280.2 (15.6); 278.4-282.1 | 271.3 (16.7); 270.7-271.8 | <b>0.55</b>                            | <b>&lt;0.001</b> |
| Outer inferior                                                       | 258.6 (14.9); 256.8-260.4 | 252.7 (16.2); 252.2-253.3 | 0.38                                   | <b>&lt;0.001</b> |
| Average thickness                                                    | 270.5 (13.5); 268.8-272.1 | 263.3 (14.2); 262.8-263.8 | <b>0.51</b>                            | <b>&lt;0.001</b> |
| Total volume                                                         | 7.64 (0.38); 7.6 - 7.7    | 7.44 (0.40); 7.43 - 7.45  | <b>0.51</b>                            | <b>&lt;0.001</b> |

ETDRS: Early Treatment Diabetic Retinopathy Study; SD: standard deviation; CST: central subfield thickness; CI: confidence interval; DM: Diabetes mellitus.

**Supplementary Table 5. Normative Data for Macular Thickness (in  $\mu\text{m}$ ) and volume (in  $\text{mm}^3$ ) measured by Spectral-Domain Optical Coherence Tomography (Topcon 3SD OCT Master), by the years since DM diagnosis.**

|                                                                  | <15 years<br>(N=2553)     | >15 years<br>(N=860)      | Absolute<br>standardized<br>difference | p-value       |
|------------------------------------------------------------------|---------------------------|---------------------------|----------------------------------------|---------------|
| <b>ETDRS macular thickness and volume,<br/>mean (SD); 95% CI</b> |                           |                           |                                        |               |
| CST                                                              | 238.6 (23.4); 237.6-239.5 | 237.1 (24.5); 235.5-238.7 | 0.06                                   | 0.118         |
| Center                                                           | 205.7 (31.4); 204.5-207.0 | 204.2 (32.1); 202.1-206.4 | 0.04                                   | 0.24          |
| Inner temporal                                                   | 285.7 (16.4); 285.1-286.4 | 283.3 (17.8); 282.1-284.5 | 0.14                                   | <b>0.0002</b> |
| Inner superior                                                   | 297.2 (18.3); 296.5-297.6 | 294.6 (18.6); 293.3-295.8 | 0.14                                   | <b>0.0003</b> |
| Inner nasal                                                      | 299.7 (17.2); 299.0-300.4 | 297.0 (18.0); 295.8-298.2 | 0.15                                   | <b>0.0001</b> |
| Inner inferior                                                   | 293.5 (17.6); 292.8-294.2 | 291.1 (19.2); 289.8-292.4 | 0.13                                   | <b>0.0009</b> |
| Outer temporal                                                   | 244.3 (17.3); 243.6-245.0 | 243.0 (17.9); 241.8-244.2 | 0.07                                   | 0.06          |
| Outer superior                                                   | 255.4 (16.1); 254.7-256.0 | 253.8 (16.8); 252.7-254.9 | 0.09                                   | <b>0.01</b>   |
| Outer nasal                                                      | 272.5 (16.8); 271.8-273.1 | 270.6 (16.9); 269.5-271.7 | 0.11                                   | <b>0.004</b>  |
| Outer inferior                                                   | 253.6 (16.1); 252.9-254.2 | 252.2 (16.6); 251.0-253.3 | 0.08                                   | <b>0.02</b>   |
| Average thickness                                                | 264.3 (14.1); 263.8-264.8 | 262.6 (14.8); 261.6-263.5 | 0.12                                   | <b>0.002</b>  |
| Total volume                                                     | 7.47 (0.4); 7.45-7.48     | 7.42 (0.42); 7.39-7.45    | 0.12                                   | <b>0.0019</b> |

ETDRS: Early treatment Diabetic retinopathy study; SD: standard deviation; CST: central subfield thickness; CI: confidence interval and DM Diabetes mellitus.
